# Supplementary material for: New insight into icing and de-icing properties of hydrophobic and hydrophilic structured surfaces based on core–shell particles
Source: Royal Society of Chemistry journal article supplement (doi:10.1039/c5sm02143j), 2015-01-01
Supplement: c5sm02143j1.pdf [file c5sm02143j1.pdf]

## Supporting Information

# New Insight into Icing and De-Icing Properties of Hydrophobic and Hydrophilic Structured Surfaces Based on Core-Shell Particles

*Jagannath Chanda, Leonid Ionov, Alina Kirillova, and Alla Synytska\**

Leibniz Institute of Polymer Research e.V. Dresden,

Hohe Str. 6, D-01069 Dresden, Germany

Technische Universität Dresden, Fakultät Mathematik und Naturwissenschaften, 01062,

Dresden, Germany

\* Dr. Alla Synytska

Leibniz Institute of Polymer Research e.V. Dresden

Hohe Str. 6, D-01069 Dresden, Germany

E-mail: [synytska@ipfdd.de](mailto:synytska@ipfdd.de) (A.S.)

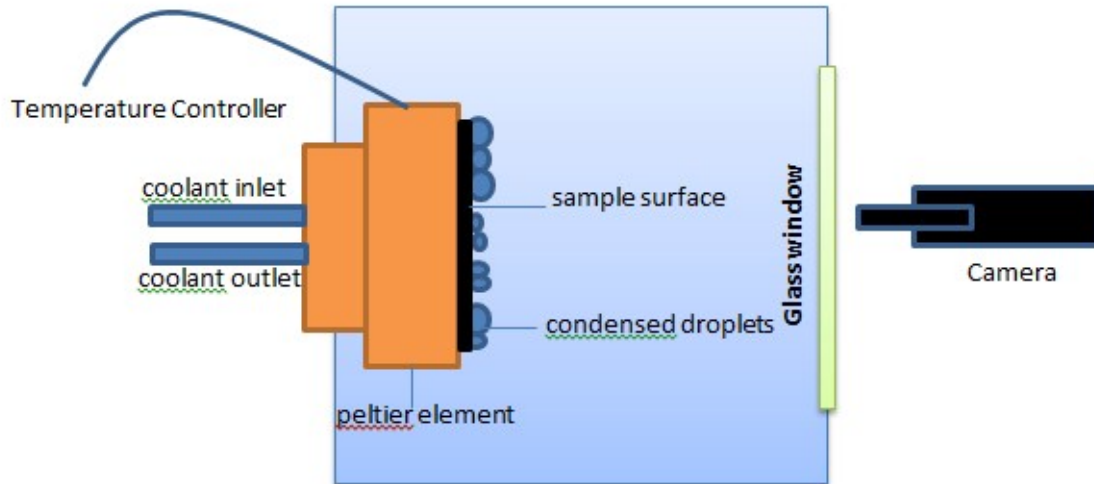

**Figure S1.** Schematic of a temperature and humidity controlled chamber for the icing and deicing tests

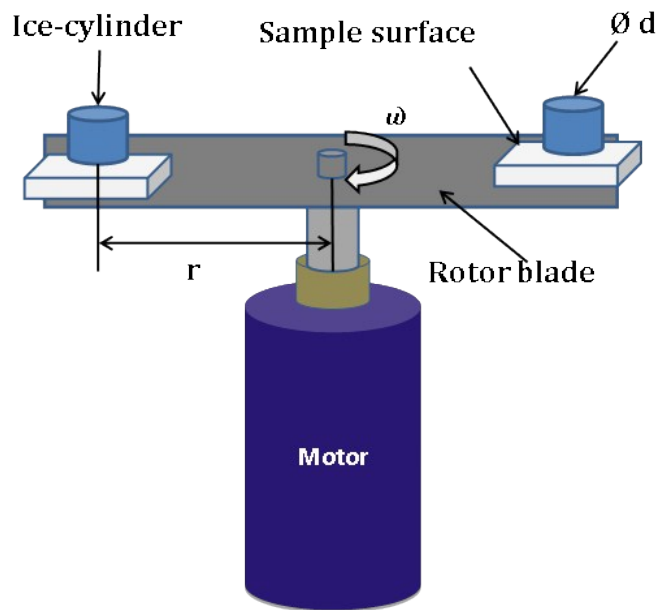

**Figure S2.** Schematic of an experimental setup for the ice-adhesion strength measurements

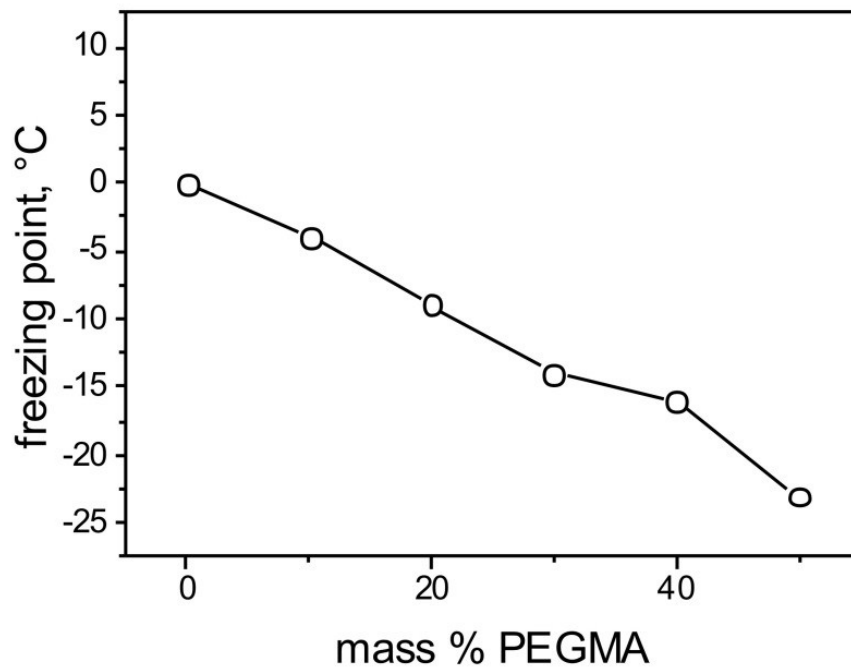

**Figure S3.** Freezing point of P(PEGMA)-water mixtures.

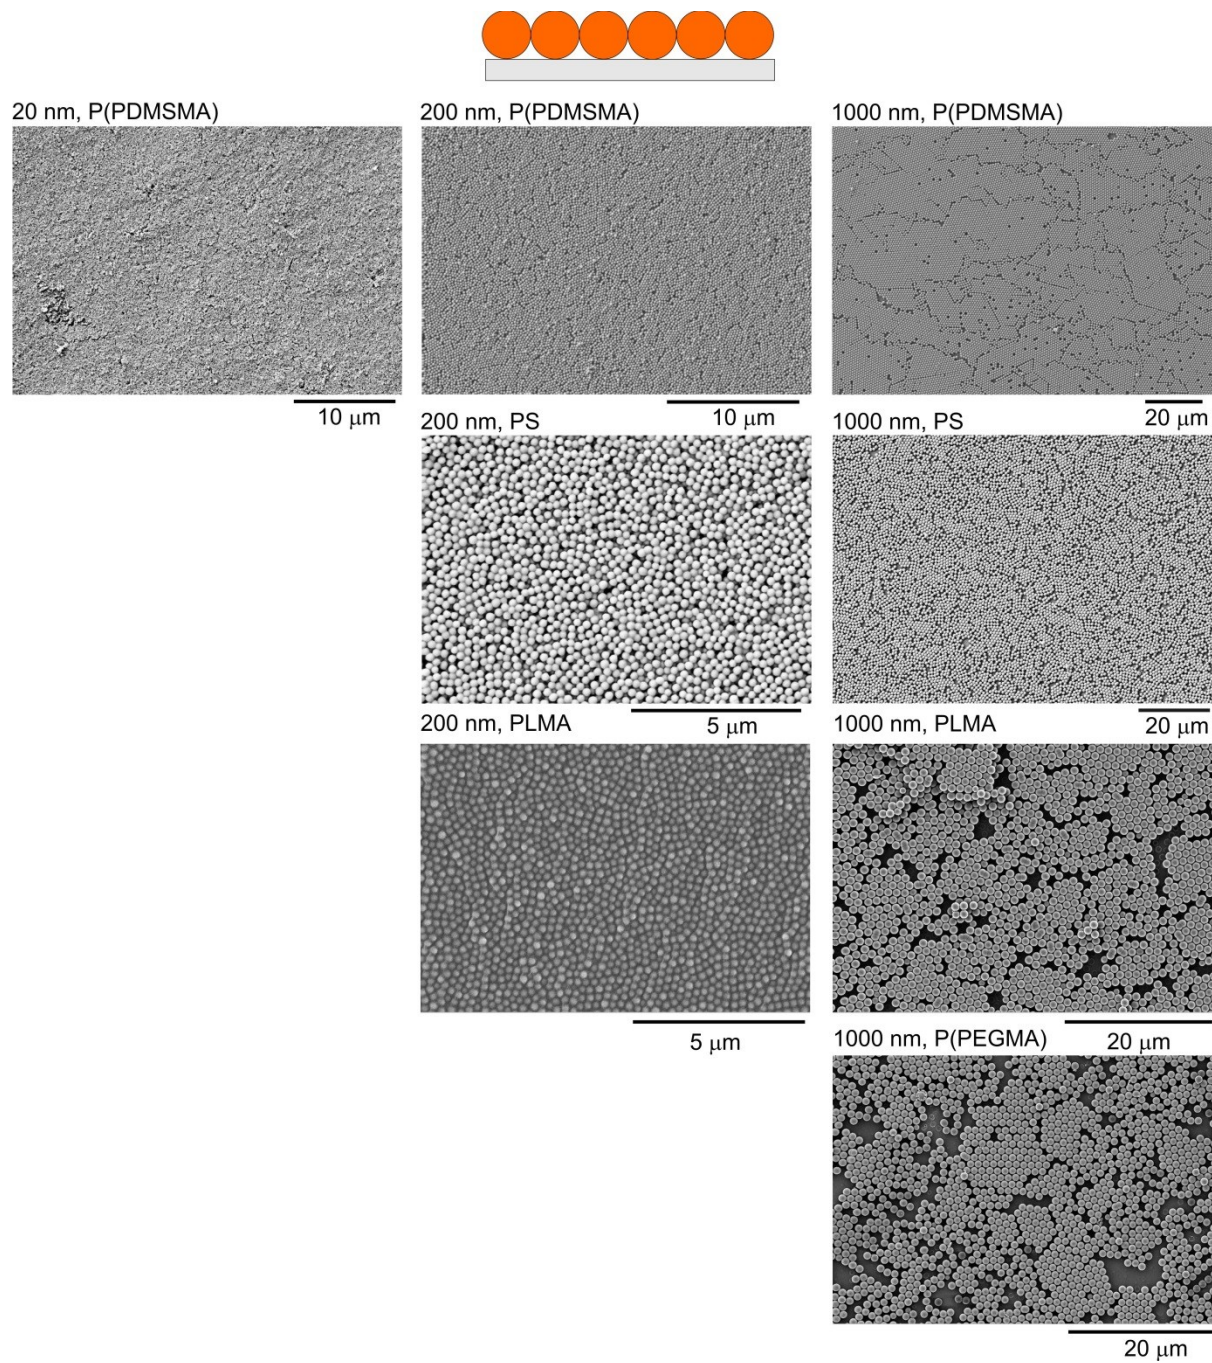

**Figure S4.** Representative SEM images of layers based on spherical core-shell particles (diameter 20 nm, 200 nm and 1000 nm) with PS, PLMA, P(PDMSMA) and P(PEGMA) shells.

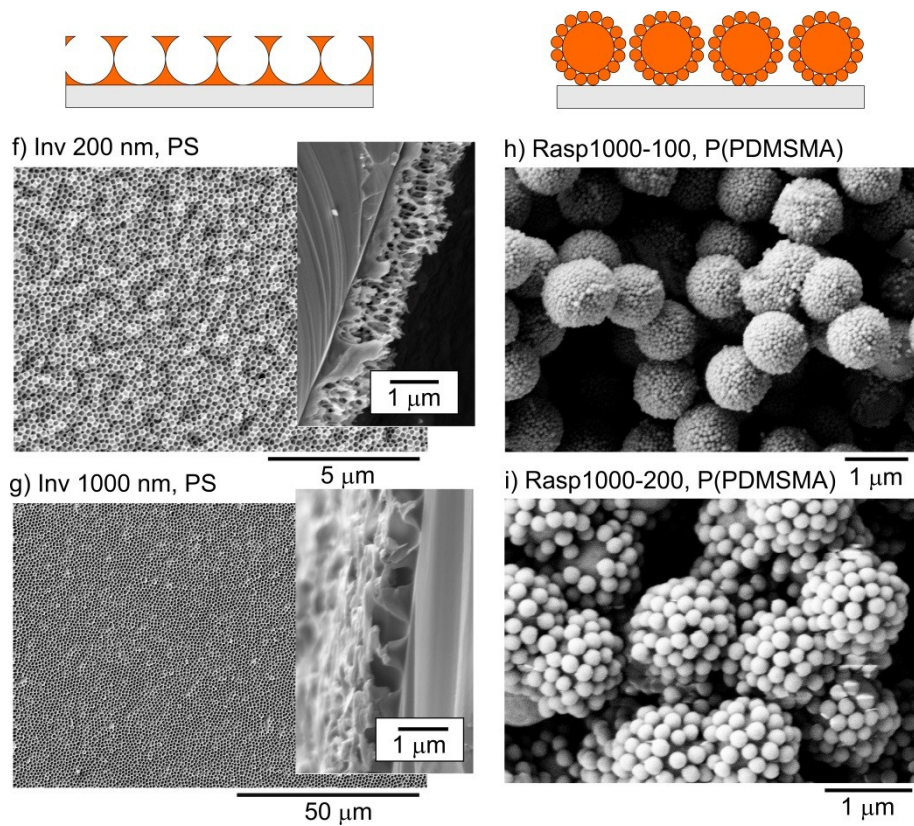

**Figure S5.** Representative SEM images of inverse structures (PS) prepared by etching of colloidal particles from the polymer matrix, and raspberry core-shell particles with a P(PDMSMA) shell.

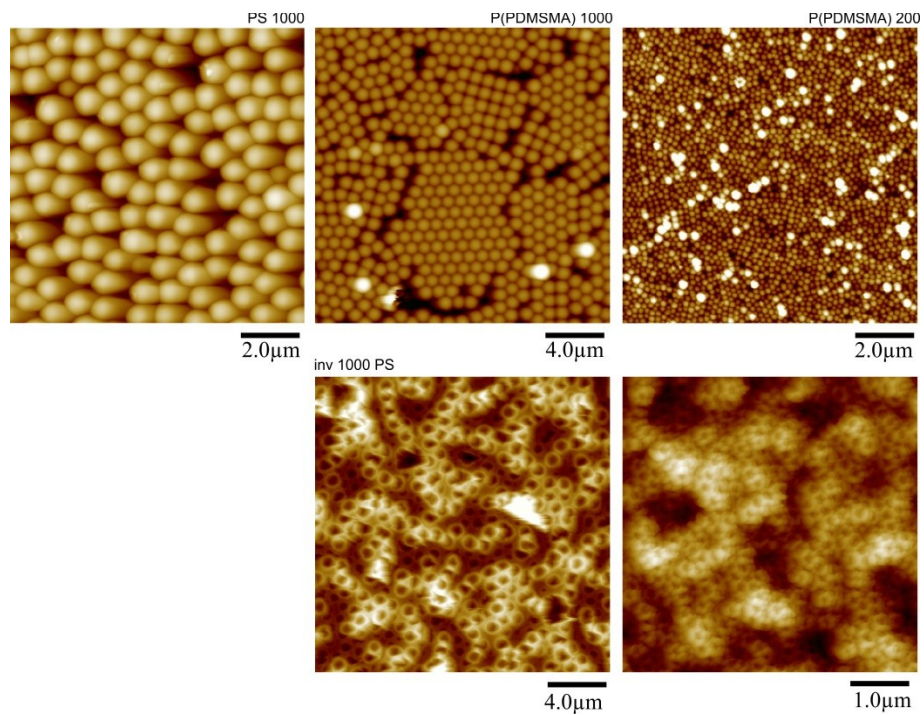

**Figure S6.** Representative AFM images of different rough and inverse structured surfaces

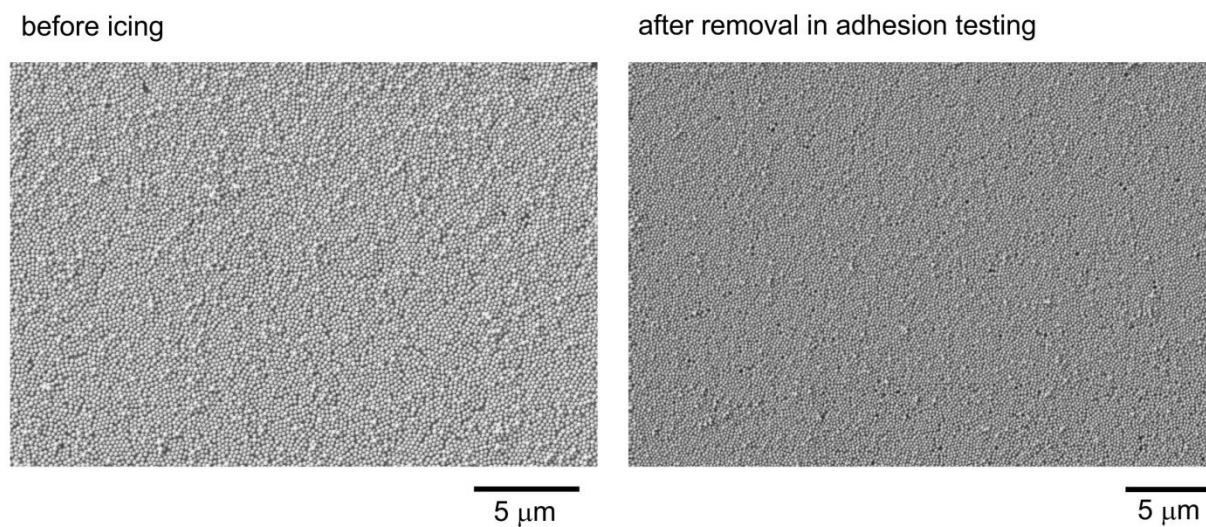

**Figure S7.** Representative SEM images of a surface with 200 nm large particles before ice adhesion measurements and after ice removal in adhesion tests (proof of robustness)

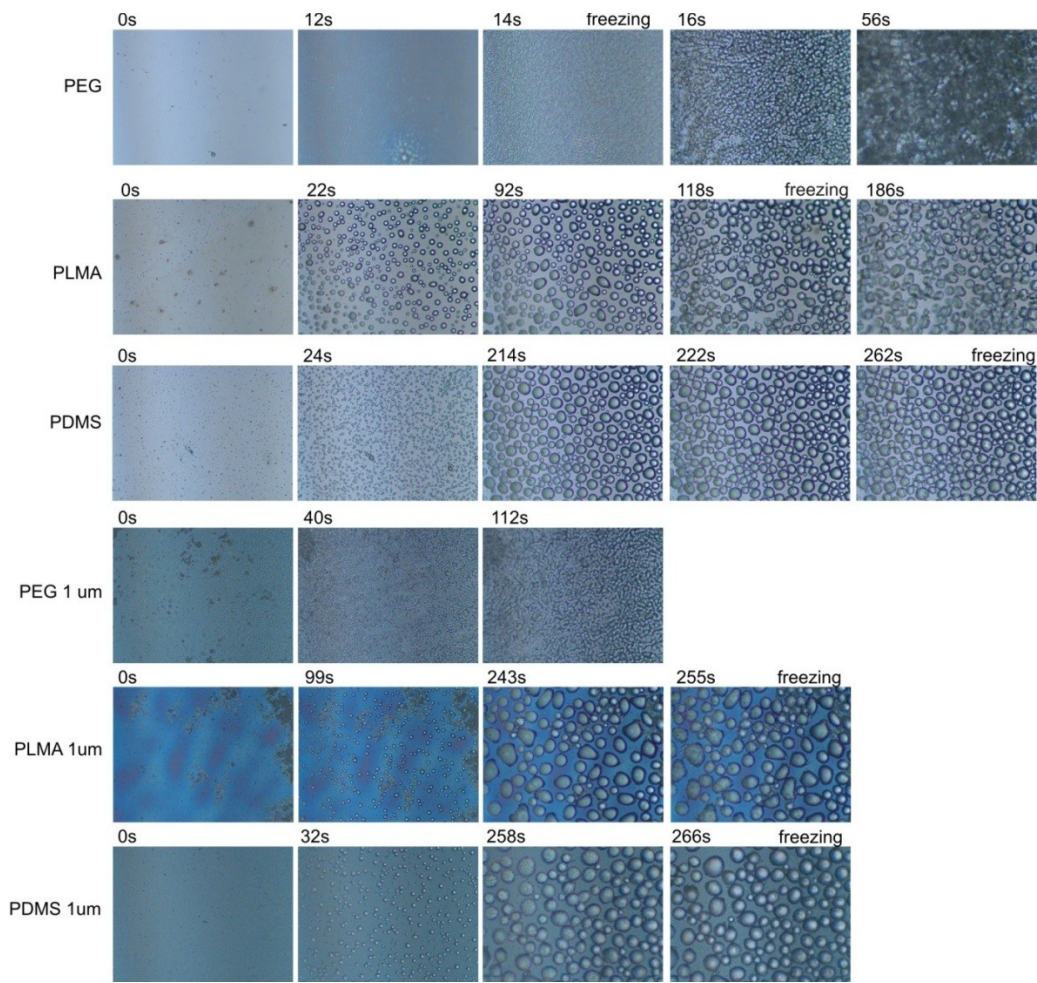

**Figure S8.** Optical microscopy images of water droplet condensation and their freezing on different polymeric surfaces

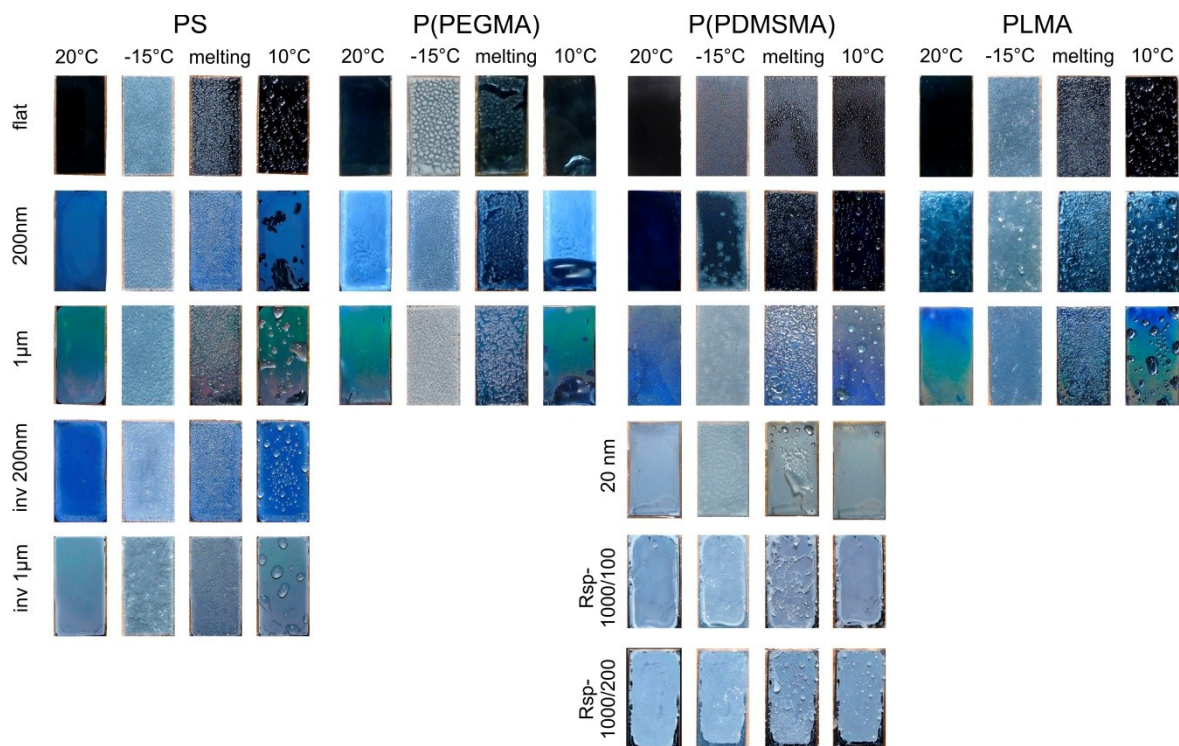

**Figure S9.** Photo images of PS, P(PEGMA), P(PDMSMA) and PLMA flat and rough surfaces during freezing (down to -15°C) and thawing (4°C).



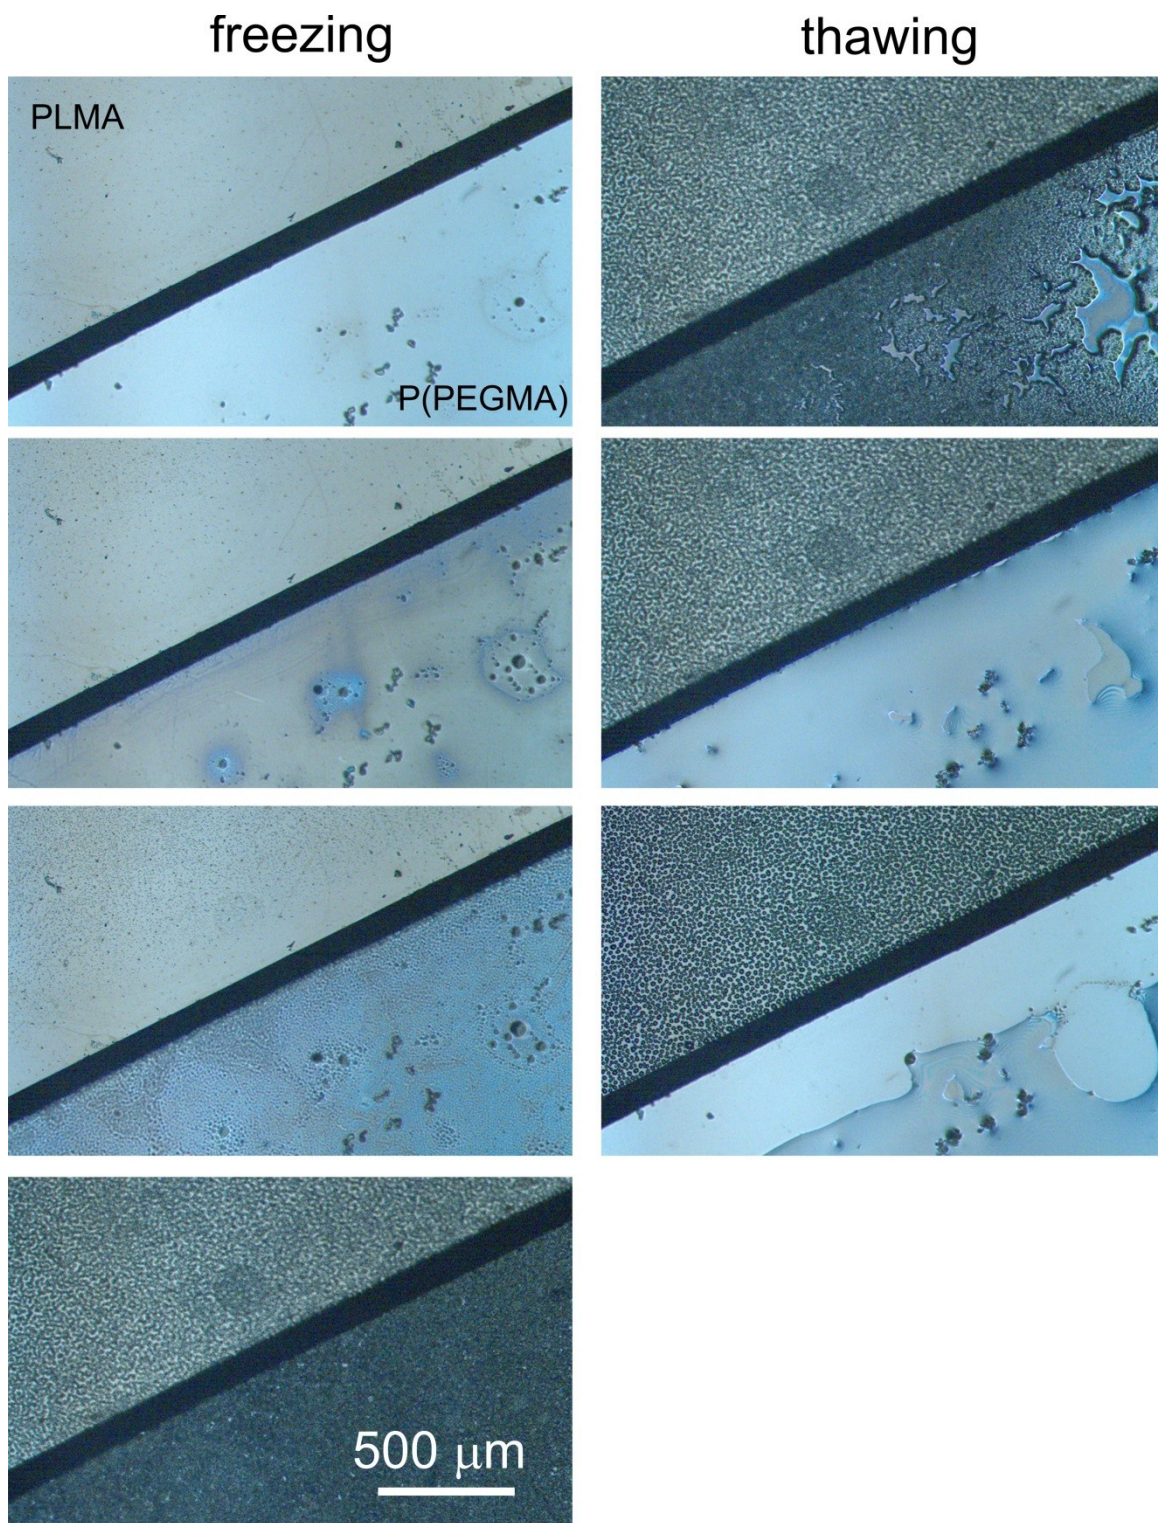

**Figure S10.** Comparative freezing and thawing of PLMA and P(PEGMA) flat surfaces (optical microscopy images)

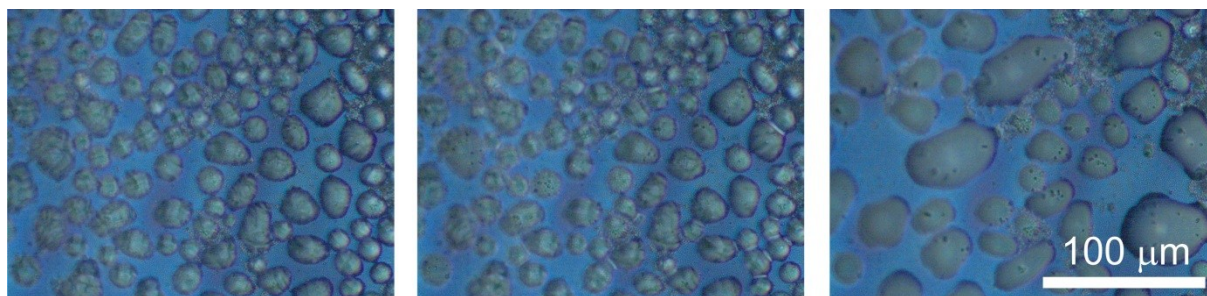

**Figure S11.** Thawing of ice on a surface with 1  $\mu\text{m}$  large PLMA particles.

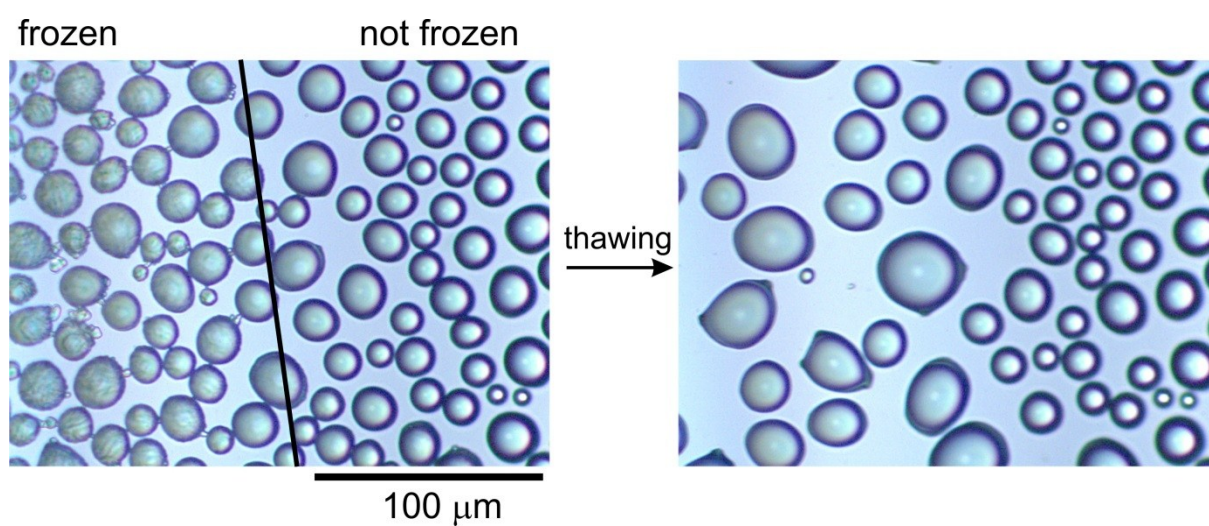

**Figure S12.** Thawing of ice on a flat PS surface (optical microscopy images)

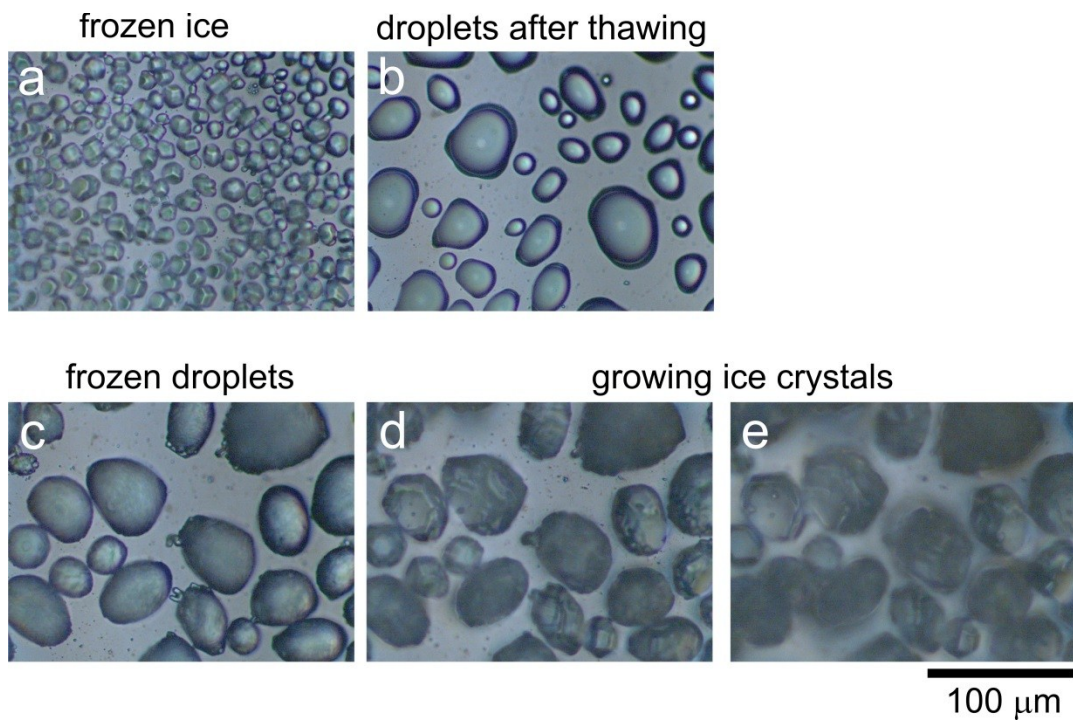

**Figure S13.** Thawing of ice crystals on a PLMA surface and re-freezing of the formed droplets (optical microscopy images)
